# Supplementary material for: The Expansion of Inosine at the Wobble Position of tRNAs, and Its Role in the Evolution of Proteomes
Source: Oxford University Press journal article supplement (doi:10.1093/molbev/msy245), 2018-12-20
Supplement: msy245_supp.pdf [file msy245_supp.pdf]

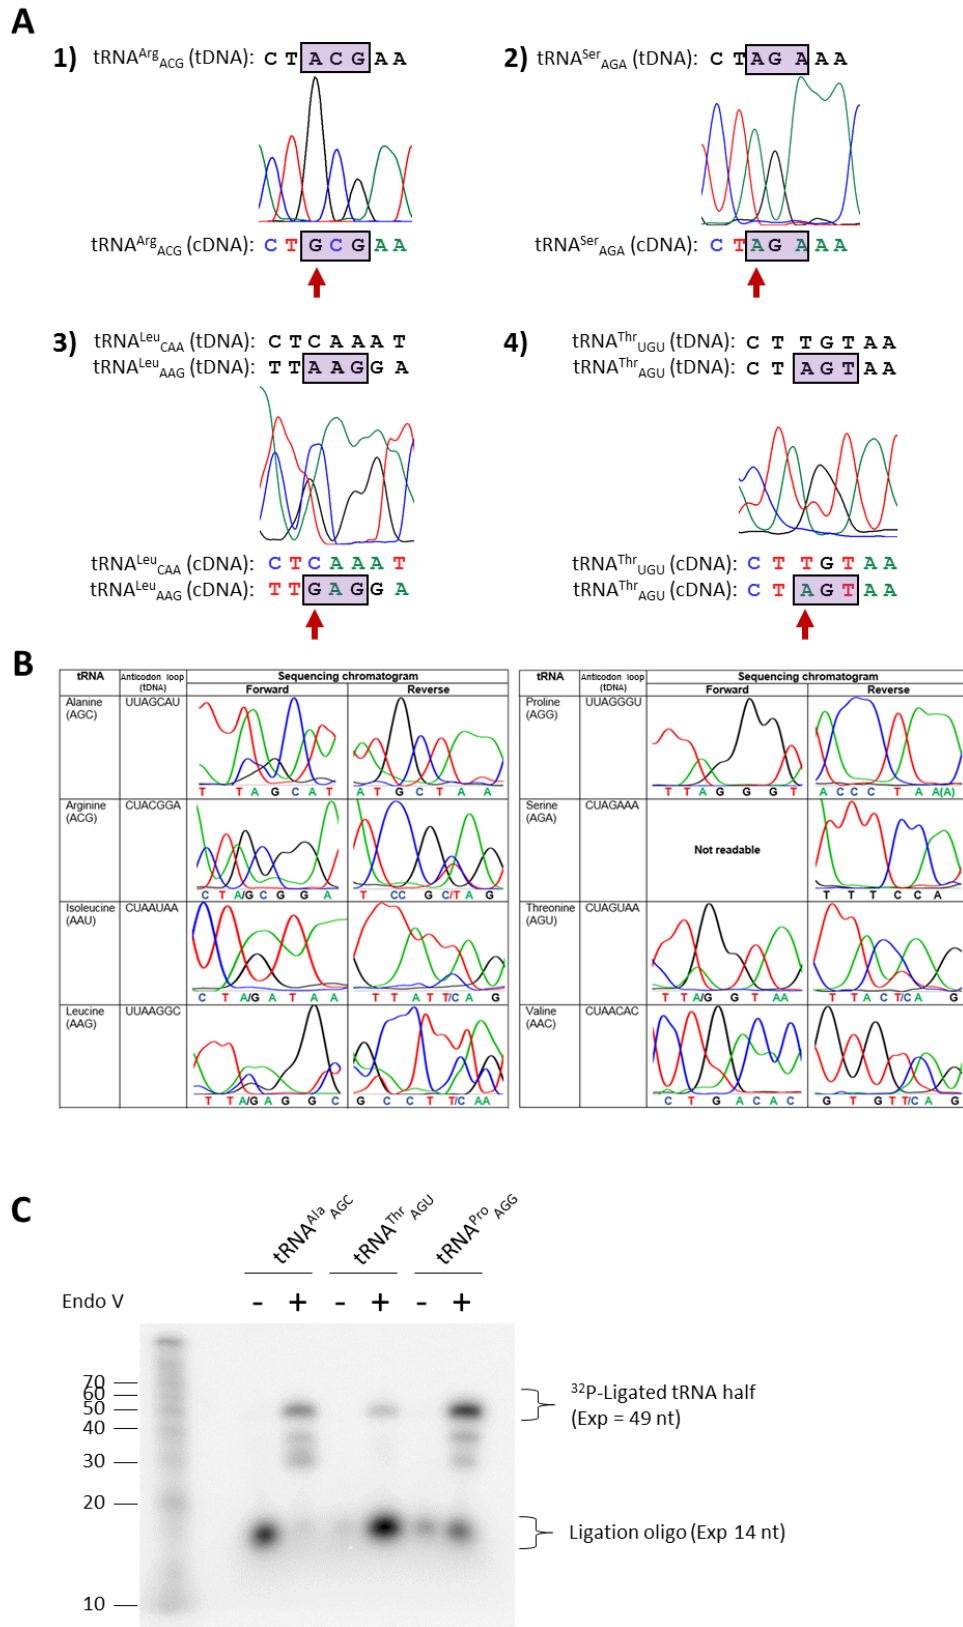

**Figure S1: (A)** Sequencing spectra of RT-PCR amplicons derived from *O. oeni* tRNA<sup>Arg</sup><sub>ACG</sub> (1), tRNA<sup>Ser</sup><sub>AGA</sub> (2), tRNA<sup>Leu</sup><sub>AAG</sub> (3), and tRNA<sup>Thr</sup><sub>AGU</sub> (4). The anticodon sequence is highlighted, the 'wobble' position is indicated (arrow). Inosine at this position should be detected as a Guanosine, as opposed to the unmodified residue which is detected as Adenosine (tDNA sequences are shown for reference). Note that due to sequence similarities, sequencing of RT-PCR amplicons derived from tRNA<sup>Leu</sup><sub>AAG</sub> are partially masked by amplicons derived from tRNA<sup>Leu</sup><sub>CAA</sub>; and those derived from tRNA<sup>Thr</sup><sub>AGU</sub> are partially masked by amplicons derived from tRNA<sup>Thr</sup><sub>UGU</sub>. **(B)** Sequencing spectra of RT-PCR amplicons derived from *T. thermophila* tRNA<sup>Ala</sup><sub>AGC</sub>, tRNA<sup>Arg</sup><sub>ACG</sub>, tRNA<sup>Ile</sup><sub>AAU</sub>, tRNA<sup>Leu</sup><sub>AAG</sub>, tRNA<sup>Pro</sup><sub>AGG</sub>, tRNA<sup>Ser</sup><sub>AGA</sub>, tRNA<sup>Thr</sup><sub>AGU</sub>, and tRNA<sup>Val</sup><sub>AAC</sub>. Sequencing spectra using Forward and Reverse primers are shown. Inosine at the anticodon 'wobble' position should be detected as a Guanosine (Cytosine in the reversed strand), as opposed to the unmodified residue which is detected as Adenosine (Thymine in the reversed strand). **(C)** Evaluation of I34 presence/absence on *T. thermophila* tRNA<sup>Ala</sup><sub>AGC</sub>, tRNA<sup>Thr</sup><sub>AGU</sub>, and tRNA<sup>Pro</sup><sub>AGG</sub> by SL-ID.

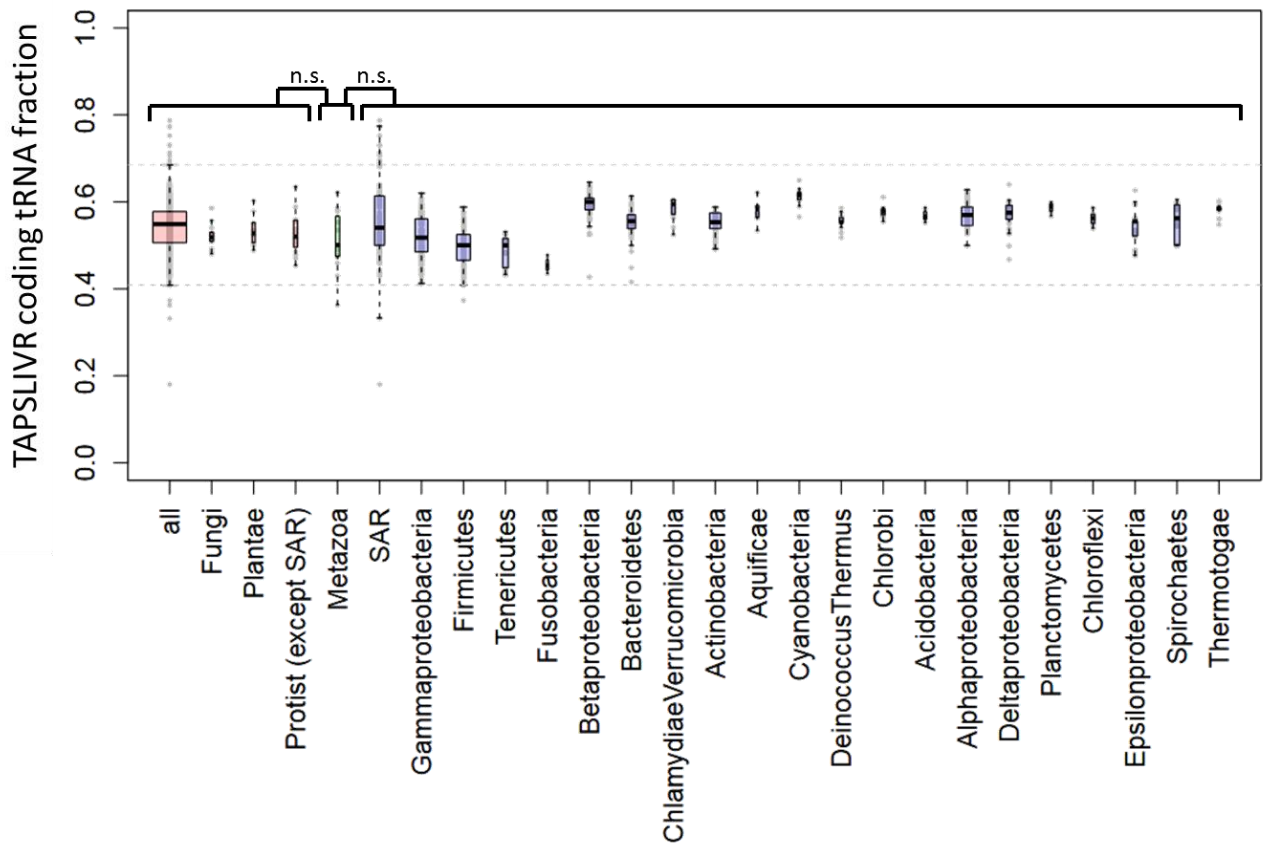

**Figure S2:** tRNA quantification boxplot for eukaryotic kingdoms (red), the eukaryotic superphylum *Heterokonta* (green) and different bacterial phyla (blue). The y-axis represents the fraction of all the isoacceptors for TAPS and LIVR amino acids among all the isoacceptors for all the amino acids. The width of each boxplot is proportional to the number of organisms analyzed. 'all' boxplot represents all the data together. Horizontal dashed lines are placed in Q1 = 0.41 and Q4 = 0.68 from 'all' boxplot.

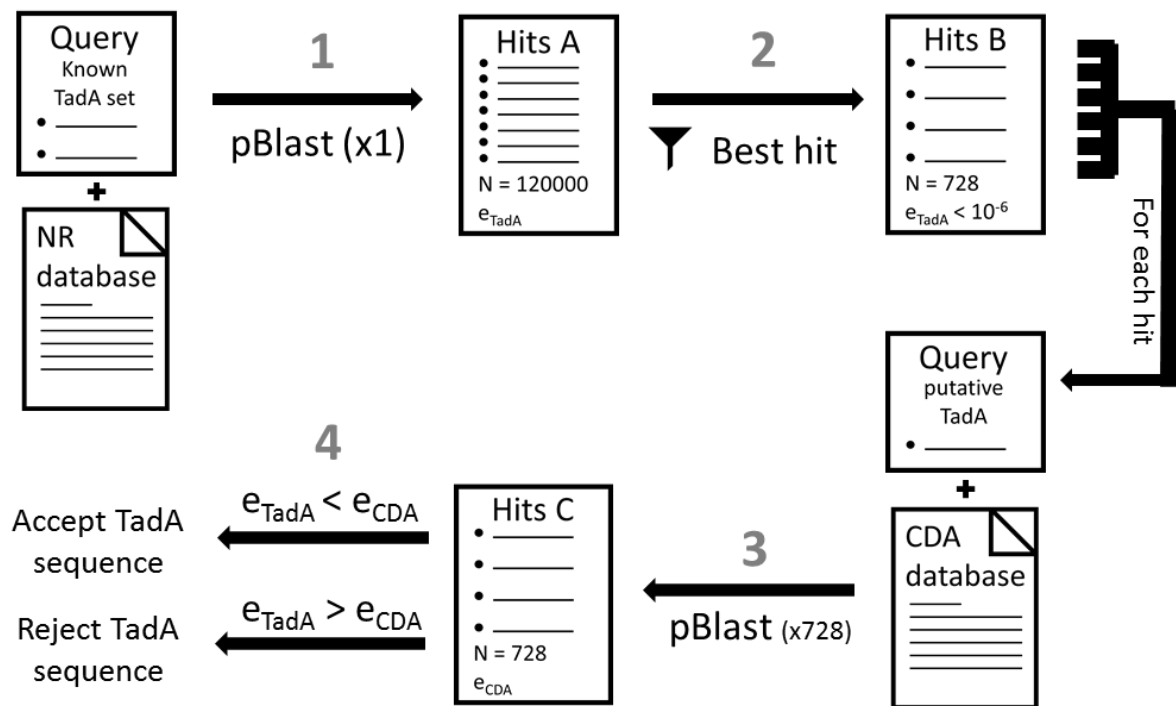

**Figure S3:** Identification of TadA sequences scheme. NR: non-redundant NCBI database.  $e_x$ : BLAST e-value from X query. CDA: cytidine deaminase. pBLAST: protein BLAST. N: number of hits. The scheme is analogous to find the ADAT2 and ADAT3 protein sequences.

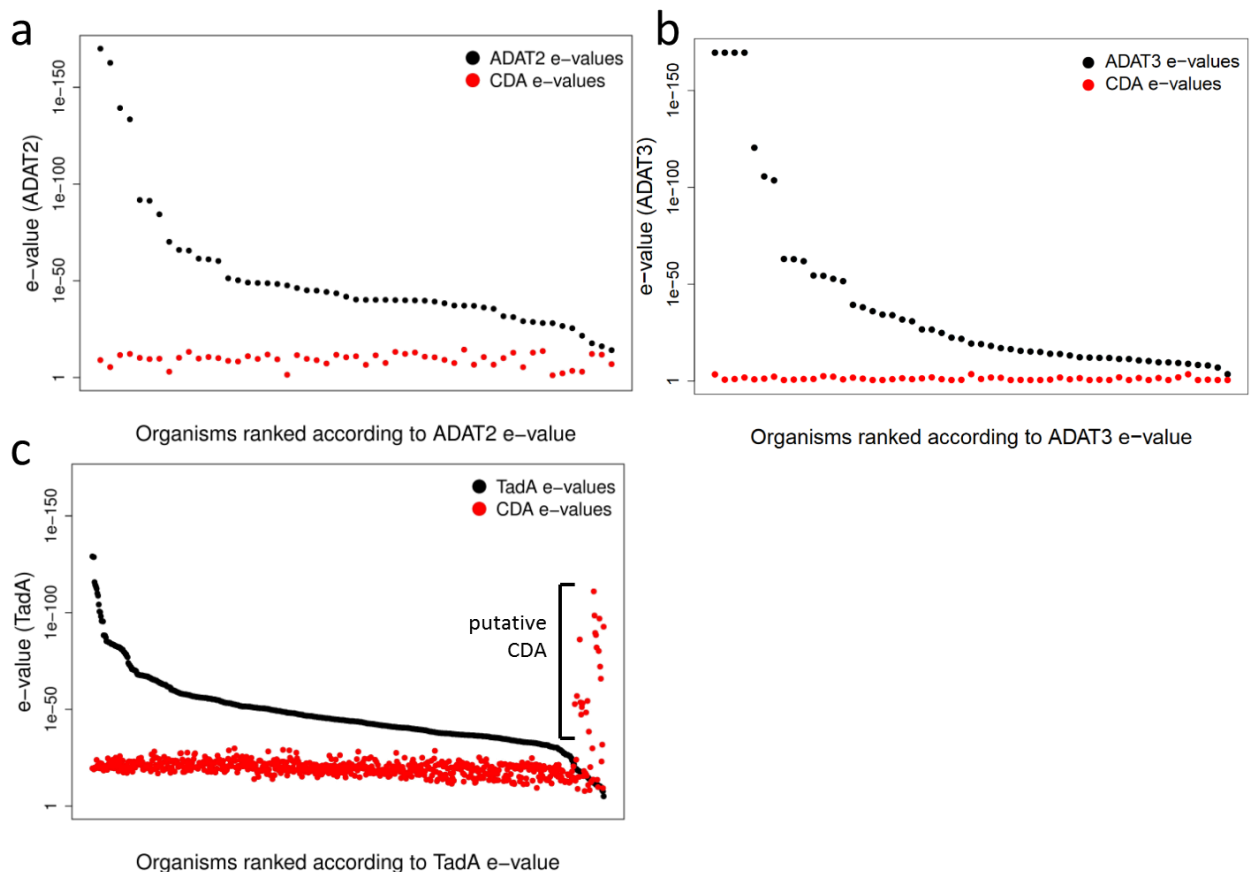

**Figure S4:** comparison of e-values between the Adenosine deaminase (black circles) and the cytidine deaminases (grey circles). The values are ranked for ADAT2 (a), ADAT3 (b) and TadA (c).

Consensus  
Identity

- H.sap\_Meta\_8
- A.tha\_Plan\_8
- N.gad\_Prof\_4
- F.gra\_Fung\_8
- N.cra\_Fung\_8
- S.pom\_Fung\_8
- S.cer\_Fung\_7
- D.mei\_Meta\_8
- D.rer\_Meta\_8
- S.pur\_Meta\_8
- P.pat\_Plan\_8
- O.luc\_Plan\_5
- A.cas\_Prof\_8
- A.lai\_Prof\_8
- D.dis\_Prof\_8
- L.maj\_Prof\_8
- P.fal\_Prof\_8
- P.tet\_Prof\_8
- T.bru\_Prof\_8
- T.the\_Prof\_8
- E.his\_Prof\_5
- G.lam\_Prof\_6
- R.fil\_Prof\_1
- T.vag\_Prof\_7
- A.ast\_Hete\_8
- A.inv\_Hete\_5
- B.hom\_Hete\_7
- B.sp\_Hete\_7
- F.cyl\_Hete\_8
- P.par\_Hete\_3
- P.hal\_Hete\_7
- S.par\_Hete\_6
- T.oce\_Hete\_7

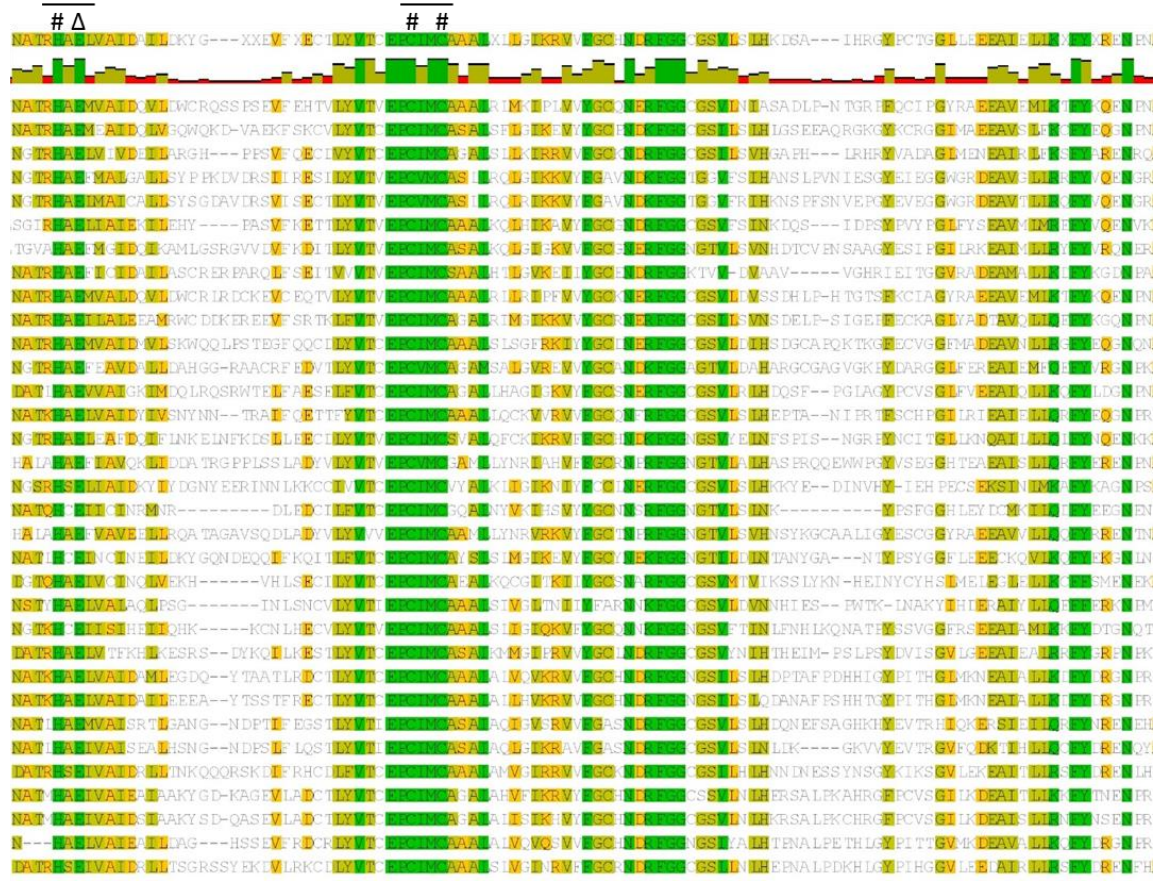

**Figure S5:** Multiple sequence alignments of ADAT2 deaminase domains. Residues with 100%, 80-100%, 60-80% and <60% of similarity are respectively framed with green, olive, orange and white. The deaminase domains are overlined, where the residues that coordinates with Zn (#) and the glutamic acid that allows the nucleophilic attack (Δ) are depicted. The organisms names are displayed as X.yyy\_zzzz\_n where X is the first letter of the Genre, yyy the first 3 letters of the specie, zzzz the 4 first letters of the phylum and n the number of different A34 tRNAs.



**A**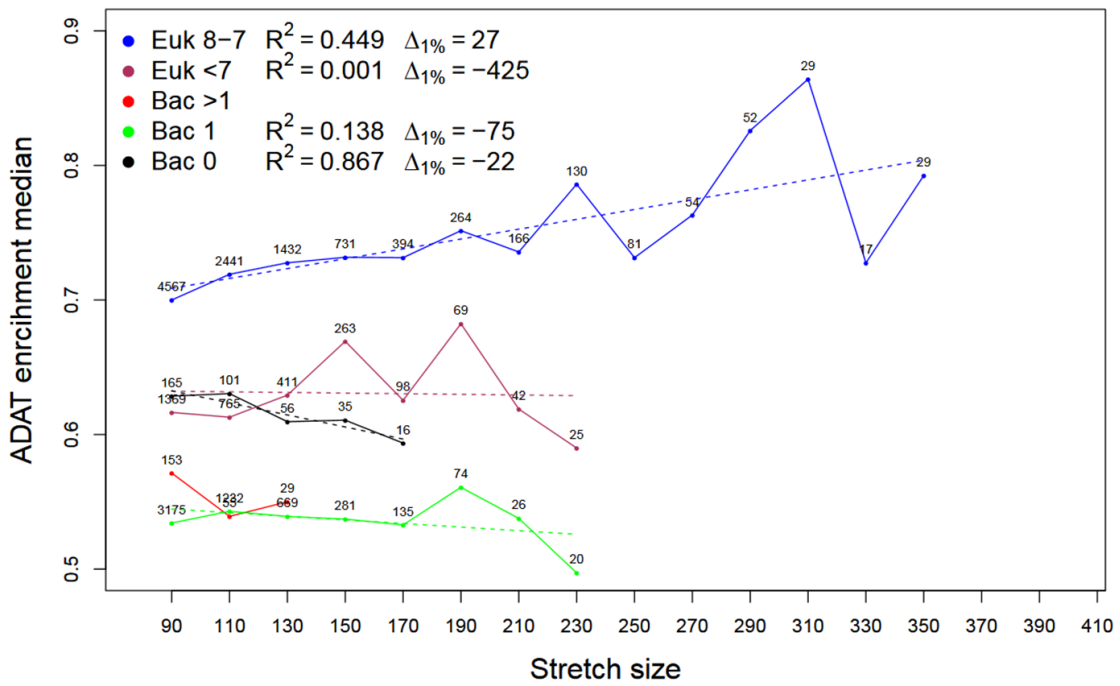**B**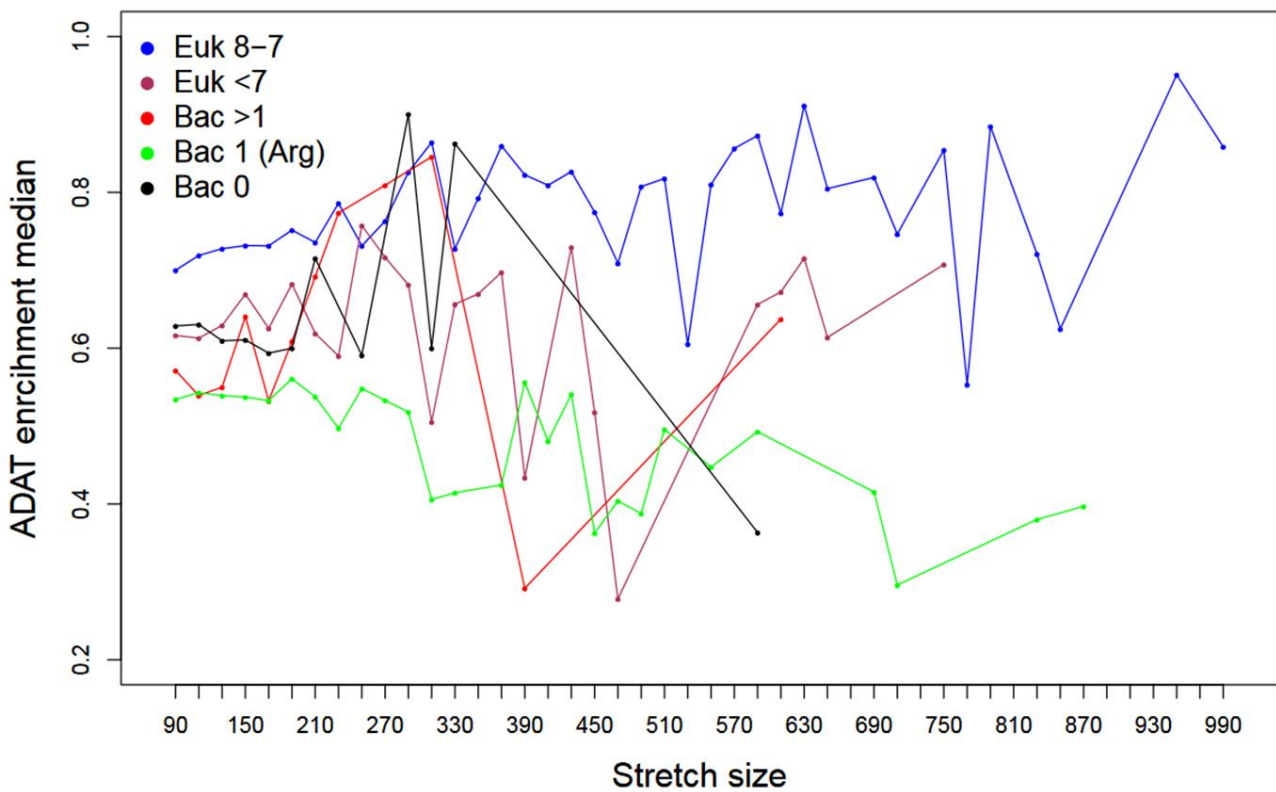

**Figure S6: (A)** ADAT stretch distribution. Median values of ADAT-sensitive codon enrichment as a function of ADAT amino acid stretch length, plotted for different groups based on A34-tRNA diversity values (color-coded). Linear regressions (colored dashed lines) were calculated for all groups with more than 5 data points. Numbers on top of each data point refer to the number of samples for each data point. Data points with less than 15 samples were omitted.  $\Delta_{1\%}$  represents the number of codons needed to increase ADAT enrichment by 1% based on the slope of the linear model. **(B)** Graph as in **(A)** showing the full ADAT stretch size distribution.

**Table S1:** oligos used for *T. thermophila* and *O. oeni* PCR amplification.

| Name     | Sequence                                  | Details                                                                           |
|----------|-------------------------------------------|-----------------------------------------------------------------------------------|
| oTFW_94  | gaatgtcataagcgCCAAGCGAGCGCTCTACCATTG      | Bridge oligo <i>T. the/H. sapiens</i> tRNA AlaAGC - Splinted Ligation             |
| oAGT_230 | gaatgtcataagcgCCAGGCGAATGCTCTAACCCTG      | Bridge oligo <i>T. the</i> tRNA ThrAGT - Splinted Ligation                        |
| oAGT_231 | gaatgtcataagcgCCAAACGAGAATCATGCCACTAG     | Bridge oligo <i>T. the</i> tRNA ProAGG - Splinted Ligation                        |
| oAGT_312 | gaatgtcataagcgGCAGTCAGACGCTCTATCCAATTG    | Bridge oligo <i>O. oeni</i> tRNA ArgACG - Splinted Ligation                       |
| oAGT_313 | gaatgtcataagcgTCAATCCTGCGGTCTGCCAATTC     | Bridge oligo <i>O. oeni</i> tRNA LeuAAG - Splinted Ligation                       |
| oAGT_314 | gaatgtcataagcgCCAGACCGACCCCTCAGCCAC       | Bridge oligo <i>O. oeni</i> tRNA SerAGA - Splinted Ligation                       |
| oAGT_315 | gaatgtcataagcgCCAGTGAAGTGTCTAGCCAAC       | Bridge oligo <i>O. oeni</i> tRNA ThrAGT - Splinted Ligation                       |
| oTFW-31  | AGCTTAATACGACTCACTATAGGGGATCTAGCTCA       | FWD primer <i>T. thermophila</i> PCR Ala                                          |
| oTFW-36  | GATCCACATGTTGGTGGAGAACCTGGGCATT           | RVR primer <i>T. thermophila</i> PCR Ala                                          |
| oTFW-37  | AGCTTAATACGACTCACTATAGGGGTGATGG           | FWD primer <i>T. thermophila</i> PCR Arg                                          |
| oTFW-42  | GATCCCCTGGCGAGATGAGCAGGACTCGAAC           | RVR primer <i>T. thermophila</i> PCR Arg                                          |
| oTFW-43  | AGCTTAATACGACTCACTATAGCTCGGGTAGCTCAG      | FWD primer <i>T. thermophila</i> PCR Ile                                          |
| oTFW-48  | GATCCCCTGGTGTCTCCGGGAGGGGCTTGAAC          | RVR primer <i>T. thermophila</i> PCR Ile                                          |
| oTFW-49  | AGCTTAATACGACTCACTATAGATGAAGTGGCCGAG      | FWD primer <i>T. thermophila</i> PCR Leu                                          |
| oTFW-54  | GATCCCCTGGTGTGATGAAGCGAGATTCGAACT         | RVR primer <i>T. thermophila</i> PCR Leu                                          |
| oTFW-55  | AGCTTAATACGACTCACTATAGGGTGTGGTCT          | FWD primer <i>T. thermophila</i> PCR Pro                                          |
| oTFW-60  | GATCCCCTGGGGGTCTCCGAGAATCGA               | RVR primer <i>T. thermophila</i> PCR Pro                                          |
| oTFW-61  | AGCTTAATACGACTCACTATAGACAATTTGTCCGAG      | FWD primer <i>T. thermophila</i> PCR Ser                                          |
| oTFW-66  | GATCCCCTGGCGACAACCTGCAGGATTCGA            | RVR primer <i>T. thermophila</i> PCR Ser                                          |
| oTFW-67  | AGCTTAATACGACTCACTATAGCCGCTTTAGCTC        | FWD primer <i>T. thermophila</i> PCR Thr                                          |
| oTFW-72  | GATCCCCTGGAGCCACTTGGCGGGATTG              | RVR primer <i>T. thermophila</i> PCR Thr                                          |
| oTFW-73  | AGCTTAATACGACTCACTATAGATTCTTAGTG          | FWD primer <i>T. thermophila</i> PCR Val                                          |
| oTFW-78  | GATCCCCTGGTGTCTCCGAGGTTTGA                | RVR primer <i>T. thermophila</i> PCR Val                                          |
| oAGT_296 | CAGGAAACAGCTATGACCCACCATTAGCGCAATTGG      | FWD primer tRNA Arg ACG <i>Oenococcus oeni</i> with M13-RP adaptor for sequencing |
| oAGT_297 | GCACCATGTAGGAGTGAAC                       | RVR primer tRNA Arg ACG <i>Oenococcus oeni</i>                                    |
| oAGT_298 | CAGGAAACAGCTATGACCGACGTGGCGGAATTGGCAG     | FWD primer tRNA Leu AAG <i>Oenococcus oeni</i> with M13-RP adaptor for sequencing |
| oAGT_299 | GGCGATGGGAGTGAACCCATAC                    | RVR primer tRNA Leu AAG <i>Oenococcus oeni</i>                                    |
| oAGT_300 | CAGGAAACAGCTATGACCGATGGATACCCCAAGTGGC     | FWD primer tRNA Ser AGA <i>Oenococcus oeni</i> with M13-RP adaptor for sequencing |
| oAGT_301 | GAGAGATTGCAACTCTCG                        | RVR primer tRNA Ser AGA <i>Oenococcus oeni</i>                                    |
| oAGT_302 | ATTTAGGTGACACTATAGAATAGCTCAGTTGGCTAGAGCAC | FWD primer tRNA Thr AGT <i>Oenococcus oeni</i> with Sp6 adaptor for sequencing    |
| oAGT_303 | TGCCGACTAGAGGATTCG                        | RVR primer tRNA Thr AGT <i>Oenococcus oeni</i>                                    |

**Table S2:** The Universal Genetic Code. ADAT codons are colored in blue (dark and soft). ADAT-sensitive codons are colored in dark blue. For each codon, the amino acid that decodes is depicted in one-letter and three-letter convention.

|                    |   | Second Codon Letter |     |   |     |      |     |      |     |   |
|--------------------|---|---------------------|-----|---|-----|------|-----|------|-----|---|
|                    |   | U                   |     | C |     | A    |     | G    |     |   |
| First Codon Letter | U | F                   | Phe | S | Ser | Y    | Tyr | C    | Cys | U |
|                    |   | F                   | Phe | S | Ser | Y    | Tyr | C    | Cys | C |
|                    |   | L                   | Leu | S | Ser | Stop |     | Stop |     | A |
|                    |   | L                   | Leu | S | Ser | Stop |     | W    | Trp | G |
|                    | C | L                   | Leu | P | Pro | H    | His | R    | Arg | U |
|                    |   | L                   | Leu | P | Pro | H    | His | R    | Arg | C |
|                    |   | L                   | Leu | P | Pro | Q    | Gln | R    | Arg | A |
|                    |   | L                   | Leu | P | Pro | Q    | Gln | R    | Arg | G |
|                    | A | I                   | Ile | T | Thr | N    | Asn | S    | Ser | U |
|                    |   | I                   | Ile | T | Thr | N    | Asn | S    | Ser | C |
|                    |   | I                   | Ile | T | Thr | K    | Lys | R    | Arg | A |
|                    |   | M                   | Met | T | Thr | K    | Lys | R    | Arg | G |
|                    | G | V                   | Val | A | Ala | D    | Asp | G    | Gly | U |
|                    |   | V                   | Val | A | Ala | D    | Asp | G    | Gly | C |
|                    |   | V                   | Val | A | Ala | E    | Glu | G    | Gly | A |
|                    |   | V                   | Val | A | Ala | E    | Glu | G    | Gly | G |
